# Supplementary material for: Flow Cytometry Analysis in Breast Implant-Associated Anaplastic Large Cell Lymphoma: Three Case Reports
Source: MDPI journal article supplement (doi:10.3390/ijms25063518), 2024-03-20
Supplement: s1 [file s1]

**Table S1.** Antibodies used in routine FCM analysis of periprosthetic fluid samples with suspected BIA-ALCL. The actual tube combination used for each sample was evaluated on a case-by-case basis. All antibodies are from Beckman Coulter Company (Brea, CA, USA).

| Tube | FITC             | PE                 | ECD                | PE-Cy5            | PE-Cy7           | KrO              |
|------|------------------|--------------------|--------------------|-------------------|------------------|------------------|
|      | Antibody (clone) | Antibody (clone)   | Antibody (clone)   | Antibody (clone)  | Antibody (clone) | Antibody (clone) |
| 1    | CD4 (13B8.2)     | CD30 (HRS4)        | CD3 (UCHT1)        | CD45 (J33)        | -                |                  |
| 2    | CD15 (80H5)      | CD30 (HRS4)        | CD3 (UCHT1)        | CD45 (J33)        | CD14 (RMO52)     |                  |
| 3    | CD4 (13B8.2)     | CD30 (HRS4)        | CD3 (UCHT1)        | CD45 (J33)        | -                |                  |
| 4    | CD2 (39C1.5)     | CD4 (13B8.2)       | CD3 (UCHT1)        | CD7 (8H8.1)       | CD5 (BL1a)       |                  |
| 5    | CD45 (J33)       | CD16/56 (3G8/N901) | CD19 (J3-119)      | CD3 (UCHT1)       | -                |                  |
| 6    | CD45 (J33)       | CD4 (13B8.2)       | CD8 (SFC121Thy2D3) | CD3 (UCHT1)       | -                |                  |
| 7    | CD2 (39C1.5)     | CD30 (HRS4)        | CD3 (UCHT1)        | CD7 (8H8.1)       | CD5 (BL1a)       |                  |
| 8    | CD43 (DFT1)      | CD30 (HRS4)        | CD3 (UCHT1)        | CD45 (J33)        | CD4 (13B8.2)     |                  |
| 9    | CD2 (39C1.5)     | CD4 (13B8.2)       | CD45 (J33)         | HLA-DR (Immu-357) | -                |                  |
| 10   | CD45 (J33)       | CD30 (HRS4)        | -                  | -                 | -                |                  |
| 11   | CD3 (UCHT1)      | CD30 (HRS4)        |                    | 7-AAD             |                  | CD45 (J33)       |

**Table S2.** Antibodies used in routine IHC analysis of periprosthetic fluid samples with suspected BIA-ALCL. The actual stain combination used for each sample was evaluated on a case-by-case basis. Antibodies are from Leica (Milan, Italy), Dako (Milan, Italy), Biocare (Milan, Italy), Diagnostic Biosystems (Pleasanton, CA, USA).

| IHC stain | Clone                               | Company               | Antibody dilution |
|-----------|-------------------------------------|-----------------------|-------------------|
| CD30      | JCM182                              | Leica                 | pre-diluted       |
| CD3       | LN10                                | Leica                 | 1:100             |
| CD4       | 4B12                                | Dako                  | 1:40              |
| CD8       | C8/144B                             | Dako                  | 1:100             |
| CD2       | AB75                                | Dako                  | pre-diluted       |
| CD5       | 4C7                                 | Leica                 | 1:200             |
| CD7       | LP15                                | Biocare               | 1:50              |
| CD20      | L26                                 | Dako                  | 1:200             |
| CD15      | MMA                                 | Leica                 | pre-diluted       |
| AE1/AE3   | AE1/AE3                             | Leica                 | 1:250             |
| EMA       | E29                                 | Biocare               | 1:100             |
| ALK-1     | ALK-1                               | Dako                  | 1:25              |
| Perforin  | 5B10                                | Diagnostic Biosystems | 1:10              |
| PAX5      | DAK-PAX5                            | Dako                  | 1:100             |
| TIA-1     | TIA-1                               | Biocare               | 1:100             |
| EBER      | In situ hybridisation probe (Leica) |                       |                   |
